# Supplementary material for: Seasonal consumption of polyphenol-rich fruits affects the hypothalamic leptin signaling system in a photoperiod-dependent mode
Source: PubMed Central journal article supplement (PMC6133929; doi:10.1038/s41598-018-31855-y), 2018-09-11
Supplement: 41598_2018_31855_MOESM1_ESM.pdf [file 41598_2018_31855_MOESM1_ESM.pdf]

# Seasonal consumption of polyphenol-rich fruits affects the hypothalamic leptin signaling system in a photoperiod-dependent mode

Maria Ibars, Gerard Aragonès, Andrea Ardid-Ruiz, Albert Gibert-Ramos, Anna Arola-Arnal, Manuel Suárez & Cinta Bladé

**Supplementary Table S1.**  
Nutrients present in raw Sweet Cherry (*Prunus avium* L.)

| Nutrient                       | Unit | Value per 100 g |
|--------------------------------|------|-----------------|
| <b>Proximates</b>              |      |                 |
| Water                          | g    | 82.25           |
| Energy                         | kcal | 63              |
| Energy                         | kJ   | 263             |
| Protein                        | g    | 1.06            |
| Total lipid (fat)              | g    | 0.2             |
| Ash                            | g    | 0.48            |
| Carbohydrate, by difference    | g    | 16.01           |
| Fiber, total dietary           | g    | 2.1             |
| Sugars, total                  | g    | 12.82           |
| Sucrose                        | g    | 0.15            |
| Glucose (dextrose)             | g    | 6.59            |
| Fructose                       | g    | 5.37            |
| Maltose                        | g    | 0.12            |
| Galactose                      | g    | 0.59            |
| <b>Minerals</b>                |      |                 |
| Calcium, Ca                    | mg   | 13              |
| Iron, Fe                       | mg   | 0.36            |
| Magnesium, Mg                  | mg   | 11              |
| Phosphorus, P                  | mg   | 21              |
| Potassium, K                   | mg   | 222             |
| Zinc, Zn                       | mg   | 0.07            |
| Copper, Cu                     | mg   | 0.06            |
| Manganese, Mn                  | mg   | 0.07            |
| Fluoride, F                    | µg   | 2               |
| <b>Vitamins</b>                |      |                 |
| Vitamin C, total ascorbic acid | mg   | 7               |
| Thiamin                        | mg   | 0.027           |
| Riboflavin                     | mg   | 0.033           |
| Niacin                         | mg   | 0.154           |
| Pantothenic acid               | mg   | 0.199           |
| Vitamin B-6                    | mg   | 0.049           |
| Folate, total                  | µg   | 4               |

|                           |    |      |
|---------------------------|----|------|
| Folate, food              | µg | 4    |
| Folate, DFE               | µg | 4    |
| Choline, total            | mg | 6.1  |
| Vitamin A                 | µg | 3    |
| Carotene, beta            | µg | 38   |
| Lutein + zeaxanthin       | µg | 85   |
| Vitamin E                 | mg | 0.07 |
| Tocopherol, beta          | mg | 0.01 |
| Tocopherol, gamma         | mg | 0.04 |
| Vitamin K (phylloquinone) | µg | 2.1  |

---

### **Lipids**

|                                    |    |       |
|------------------------------------|----|-------|
| Fatty acids, total saturated       | g  | 0.038 |
| 14:00                              | g  | 0.001 |
| 16:00                              | g  | 0.027 |
| 18:00                              | g  | 0.009 |
| Fatty acids, total monounsaturated | g  | 0.047 |
| 16:1 undifferentiated              | g  | 0.001 |
| 18:1 undifferentiated              | g  | 0.047 |
| Fatty acids, total polyunsaturated | g  | 0.052 |
| 18:2 undifferentiated              | g  | 0.027 |
| 18:3 undifferentiated              | g  | 0.026 |
| Phytosterols                       | mg | 12    |

---

### **Amino Acids**

|               |   |       |
|---------------|---|-------|
| Tryptophan    | g | 0.009 |
| Threonine     | g | 0.022 |
| Isoleucine    | g | 0.02  |
| Leucine       | g | 0.03  |
| Lysine        | g | 0.032 |
| Methionine    | g | 0.01  |
| Cystine       | g | 0.01  |
| Phenylalanine | g | 0.024 |
| Tyrosine      | g | 0.014 |
| Valine        | g | 0.024 |
| Arginine      | g | 0.018 |
| Histidine     | g | 0.015 |
| Alanine       | g | 0.026 |
| Aspartic acid | g | 0.569 |
| Glutamic acid | g | 0.083 |
| Glycine       | g | 0.023 |
| Proline       | g | 0.039 |
| Serine        | g | 0.03  |

---

*USDA National Nutrient Database for Standard Reference, software version 3.9.2, 2018.*

**Supplementary Table S2.**Polyphenols present in raw Sweet Cherry (*Prunus avium* L.)

| <b>Polyphenol Type</b>       | <b>Unit</b> | <b>Value per 100 g</b> |
|------------------------------|-------------|------------------------|
| Total polyphenols            | mg          | 174.90                 |
| <b>Flavonoids</b>            |             |                        |
| <b>Anthocyanins</b>          |             |                        |
| Cyanidin 3-O-glucoside       | mg          | 18.73                  |
| Cyanidin 3-O-rutinoside      | mg          | 143.27                 |
| Pelargonidin 3-O-rutinoside  | mg          | 1.24                   |
| Peonidin 3-O-glucoside       | mg          | 0.76                   |
| Peonidin 3-O-rutinoside      | mg          | 7.42                   |
| <b>Flavanols</b>             |             |                        |
| (+)-Catechin                 | mg          | 1.5                    |
| (-)-Epicatechin              | mg          | 7.78                   |
| (-)-Epicatechin 3-O-gallate  | mg          | 0.09                   |
| (-)-Epigallocatechin         | mg          | 0.05                   |
| Procyanidin dimer B1         | mg          | 0.23                   |
| Procyanidin dimer B2         | mg          | 2.1                    |
| Procyanidin dimer B3         | mg          | 0.08                   |
| Procyanidin dimer B4         | mg          | 0.18                   |
| Procyanidin dimer B5         | mg          | 0.2                    |
| Procyanidin dimer B7         | mg          | 1.01                   |
| Procyanidin trimer C1        | mg          | 1.85                   |
| <b>Phenolic acids</b>        |             |                        |
| <b>Hydroxycinnamic acids</b> |             |                        |
| 3-Caffeoylquinic acid        | mg          | 44.71                  |
| 3-Feruloylquinic acid        | mg          | 0.43                   |
| 3-p-Coumaroylquinic acid     | mg          | 38.43                  |
| 4-Caffeoylquinic acid        | mg          | 0.77                   |
| 4-p-Coumaroylquinic acid     | mg          | 1.27                   |
| 5-Caffeoylquinic acid        | mg          | 2.2                    |

*Phenol-Explorer, database on polyphenol content in foods, software version 3.6, 2015.*

**Supplementary Table S3.**Nutrients present in raw (black) Grape (*Vitis vinifera* L.)

| <b>Nutrient</b>                    | <b>Unit</b> | <b>Value per 100 g</b> |
|------------------------------------|-------------|------------------------|
| <b>Proximates</b>                  |             |                        |
| Water                              | g           | 80.54                  |
| Energy                             | kcal        | 69                     |
| Protein                            | g           | 0.72                   |
| Total lipid (fat)                  | g           | 0.16                   |
| Carbohydrate, by difference        | g           | 18.1                   |
| Fiber, total dietary               | g           | 0.9                    |
| Sugars, total                      | g           | 15.48                  |
| <b>Minerals</b>                    |             |                        |
| Calcium, Ca                        | mg          | 10                     |
| Iron, Fe                           | mg          | 0.36                   |
| Magnesium, Mg                      | mg          | 7                      |
| Phosphorus, P                      | mg          | 20                     |
| Potassium, K                       | mg          | 191                    |
| Sodium, Na                         | mg          | 2                      |
| Zinc, Zn                           | mg          | 0.07                   |
| <b>Vitamins</b>                    |             |                        |
| Vitamin C, total ascorbic acid     | mg          | 3.2                    |
| Thiamin                            | mg          | 0.069                  |
| Riboflavin                         | mg          | 0.07                   |
| Niacin                             | mg          | 0.188                  |
| Vitamin B-6                        | mg          | 0.086                  |
| Folate, DFE                        | µg          | 2                      |
| Vitamin A,                         | µg          | 3                      |
| Vitamin E (alpha-tocopherol)       | mg          | 0.19                   |
| Vitamin K (phylloquinone)          | µg          | 14.6                   |
| <b>Lipids</b>                      |             |                        |
| Fatty acids, total saturated       | g           | 0.054                  |
| Fatty acids, total monounsaturated | g           | 0.007                  |
| Fatty acids, total polyunsaturated | g           | 0.048                  |

*USDA National Nutrient Database for Standard Reference, software version 3.9.2 2018-04-30*

**Supplementary Table S4.**Polyphenols present in raw (black) Grape (*Vitis vinifera* L.)

| <b>Polyphenols</b>                       | <b>Unit</b> | <b>Value per 100 g</b> |
|------------------------------------------|-------------|------------------------|
| Total polyphenols                        | mg          | 174.90                 |
| <b>Flavonoids</b>                        |             |                        |
| <b>Anthocyanins</b>                      |             |                        |
| Cyanidin 3-O-(6"-p-coumaroyl-glucoside)  | mg          | 0.1                    |
| Cyanidin 3-O-glucoside                   | mg          | 1.08                   |
| Delphinidin 3-O-(6"-acetyl-glucoside)    | mg          | 0.54                   |
| Delphinidin 3-O-glucoside                | mg          | 2.63                   |
| Malvidin 3-O-(6"-acetyl-glucoside)       | mg          | 9.66                   |
| Malvidin 3-O-(6"-p-coumaroyl-glucoside)  | mg          | 9.91                   |
| Malvidin 3-O-glucoside                   | mg          | 39.23                  |
| Peonidin 3-O-(6"-p-coumaroyl-glucoside)  | mg          | 0.34                   |
| Peonidin 3-O-glucoside                   | mg          | 5.8                    |
| Petunidin 3-O-(6"-p-coumaroyl-glucoside) | mg          | 0.05                   |
| Petunidin 3-O-glucoside                  | mg          | 2.76                   |
| <b>Flavanols</b>                         |             |                        |
| (+)-Catechin                             | mg          | 5.46                   |
| (-)-Epicatechin                          | mg          | 5.24                   |
| (-)-Epicatechin 3-O-gallate              | mg          | 1.68                   |
| (-)-Epigallocatechin                     | mg          | 0.03                   |
| Procyanidin dimer B1                     | mg          | 0.43                   |
| Procyanidin dimer B2                     | mg          | 0.36                   |
| Procyanidin dimer B3                     | mg          | 0.12                   |
| Procyanidin dimer B4                     | mg          | 0.33                   |
| Procyanidin trimer C1                    | mg          | 0.38                   |
| <b>Flavonols</b>                         |             |                        |
| Quercetin 3-O-galactoside                | mg          | 0.93                   |
| Quercetin 3-O-glucuronide                | mg          | 2.15                   |
| <b>Phenolic acids</b>                    |             |                        |
| <b>Hydroxycinnamic acids</b>             |             |                        |
| Caffeoyl tartaric acid                   | mg          | 1.13                   |
| p-Coumaroyl tartaric acid                | mg          | 0.56                   |
| <b>Stilbenes</b>                         |             |                        |
| <b>Stilbenes</b>                         |             |                        |
| Piceatannol                              | mg          | 5.20E-03               |
| Resveratrol                              | mg          | 0.15                   |
| Resveratrol 3-O-glucoside                | mg          | 0.03                   |
| Trans-Resveratrol                        | mg          | 0.15                   |
| Trans-Resveratrol 3-O-glucoside          | mg          | 1.00E-02               |

*Phenol-Explorer, database on polyphenol content in foods, software version 3.6, 2015.*

**Supplementary Table S5.**

Primer sequences used in qPCR amplification

| <b>Gene</b>  | <b>Sequence</b>                                                           | <b>Product size (bp)</b> | <b>GenBank accession no/reference</b> |
|--------------|---------------------------------------------------------------------------|--------------------------|---------------------------------------|
| <i>Obrb</i>  | Forward 5'-CCAGTACCCAGAGCCAAAGT<br>Reverse 5'-GGATCGGGCTTCACAACAAGC       | 122                      | NM_012596.1                           |
| <i>Socs3</i> | Forward 5'-CTGGACCCATTCGGGAGTTC<br>Reverse 5'-CTGGGAGCTACCGACCATTG        | 148                      | NM_053565.1                           |
| <i>Ptp1b</i> | Forward 5'-CCCTTTTGACCACAGTCGGA<br>Reverse 5'-TTGGTAAAGGGCCCTGGGTG        | 119                      | NM_012637.2                           |
| <i>Pomc</i>  | Forward 5'-GAGGCGACGGAGGAGAAAAG<br>Reverse 5'-TGAGGCTCTGTCCGGAAA          | 98                       | NM_139326.2                           |
| <i>AgRP</i>  | Forward 5'-GAGAACTCTGGGAACAGGGC<br>Reverse 5'-CAAGCAAAGGCCATGCTGAC        | 140                      | NM_033650.1                           |
| <i>Npy</i>   | Forward 5'-CTATCCCTGCTCGTGTGTTTGG<br>Reverse 5'-TGGTGATGAGATTGATGTAGTGTCG | 136                      | Sun B et al. 2014                     |
| <i>Mc4r</i>  | Forward 5'-CAACTCCTTTGCAAGCTCCG<br>Reverse 5'-TCCAACCTCCTAGGTCAGGG        | 129                      | NM_013099.3                           |
| <i>Npy1r</i> | Forward 5'-TCTTCTCTGCCCTTCGTGATC<br>Reverse 5'-TGAACGCCGCAAGTGATACA       | 73                       | NM_001113357.1                        |
| <i>Ppia</i>  | Forward 5'-CTTCGAGCTGTTTGCAGACAA<br>Reverse 5'-AAGTCACCACCCTGGCACATG      | 138                      | NM_017101.1                           |
| <i>Rplp0</i> | Forward 5'-GGACCTCACCGAGATTAGGG<br>Reverse 5'-CCCACCTTGCTCCAGTCTT         | 225                      | NM_022402.2                           |

*Obrb*, leptin receptor isoform b; *Socs3*, suppressor of cytokine signaling 3; *Ptp1b*, protein tyrosine phosphate 1B; *Pomc*, proopiomelanocortin; *AgRP*, agouti-related protein; *Npy*, neuropeptide Y; *Mc4r*, melanocortin 4 receptor; *Npy1r*, neuropeptide Y receptor Y1; *Ppia*, peptidylprolyl isomerase A; *Rplp0*, ribosomal protein lateral stalk subunit P0.

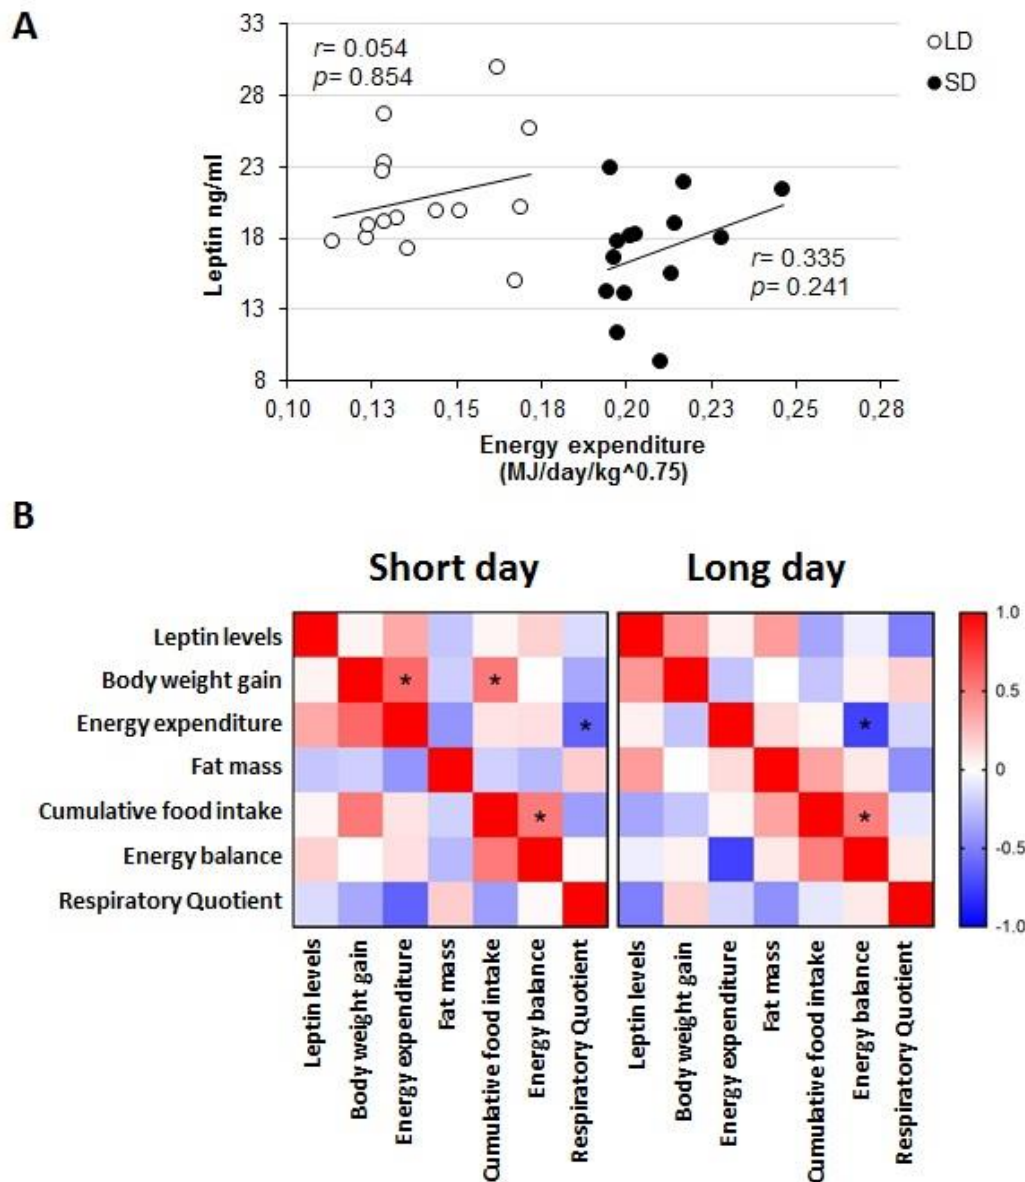

**Supplementary Figure S1. Correlation analyses of metabolic variables in non-obese animals.** (A) Global correlation plot between 24 h energy expenditure and circulating leptin levels of all non-obese animals in relation to either long-day (LD) or short-day (SD). (B) Heatmaps showing the Pearson correlation ( $r$ ) coefficients between serum leptin (ng/ml), body weight gain (g), 24 h energy expenditure (MJ/day/kg<sup>0.75</sup>), fat mass %, cumulative food intake (MJ), 24 h energy balance (MJ) estimated by the difference between energy intake and energy expenditure and finally the 24 h respiratory quotient in relation to either long-day (LD) or short-day (SD). Strength and direction of the association between two variables is represented by  $r$  values ranging from -1 to 0 for negatively associated and 0 to 1 for positively associated parameters, coloured in blue to red respectively. Values are presented as the mean  $\pm$  SEM of six animals per group. \*adjusted P-value  $\leq 0.05$  taking the variables on the Y axis as reference.

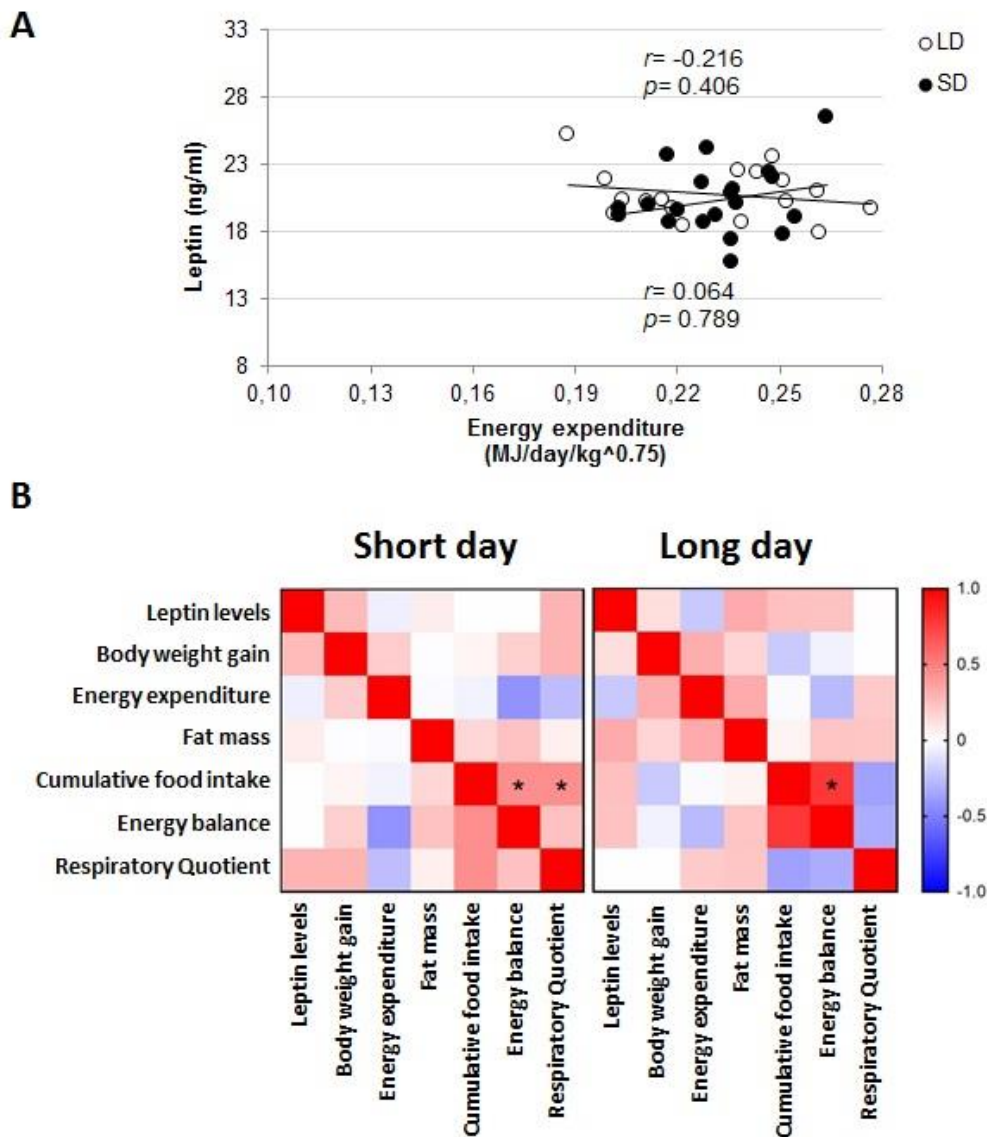

**Supplementary Figure S2. Correlation analyses of metabolic variables in obese animals.** (A) Global correlation plot between 24 h energy expenditure and circulating leptin levels of all obese animals in relation to either long-day (LD) or short-day (SD). (B) Heatmaps showing the Pearson correlation ( $r$ ) coefficients between serum leptin (ng/ml), body weight gain (g), 24 h energy expenditure (MJ/day/kg<sup>0.75</sup>), fat mass %, cumulative food intake (MJ), 24 h energy balance (MJ) estimated by the difference between energy intake and energy expenditure and finally the 24 h respiratory quotient in relation to either long-day (LD) or short-day (SD). Strength and direction of the association between two variables is represented by  $r$  values ranging from -1 to 0 for negatively associated and 0 to 1 for positively associated parameters, coloured in blue to red respectively. Values are presented as the mean  $\pm$  SEM of six animals per group. \*adjusted P-value  $\leq 0.05$  taking the variables on the Y axis as reference.
